# Supplementary material for: Correlates of Self-Reported Sleep Duration in Middle-Aged and Elderly Koreans: from the Health Examinees Study
Source: PubMed Central journal article supplement (PMC4416918; doi:10.1371/journal.pone.0123510), 2015-05-01
Supplement: pone.0123510.s001.pdf [file pone.0123510.s001.pdf]

**S1 Table. Basic characteristics of the study population**

|                                    | <b>Men</b><br>(N=27,717) | <b>Women</b><br>(N=56,377) | <b>P<sup>a</sup></b> |
|------------------------------------|--------------------------|----------------------------|----------------------|
| <b>Sleep duration</b>              |                          |                            |                      |
| <b>Hours per day</b>               |                          |                            | <0.001               |
| < 6 hours                          | 2,868 (10.4)             | 7,260 (12.9)               |                      |
| 6-7 hours                          | 17,885 (64.5)            | 33,950 (60.2)              |                      |
| 8-9 hours                          | 6,430 (23.2)             | 14,009 (25.9)              |                      |
| ≥ 10 hours                         | 534 (1.9)                | 1,158 (2.0)                |                      |
| <b>Sociodemographic factors</b>    |                          |                            |                      |
| <b>Age (years, mean±SD)</b>        | 53.9 ± 8.2               | 52.4 ± 7.6                 | <0.001               |
| 40-49                              | 9,372 (33.8)             | 22,344 (39.6)              |                      |
| 50-59                              | 10,335 (37.3)            | 22,340 (39.6)              |                      |
| 60-69                              | 8,010 (28.9)             | 11,693 (20.7)              |                      |
| <b>Educational attainment</b>      |                          |                            | <0.001               |
| Middle school or below             | 7,291 (26.3)             | 24,195 (42.9)              |                      |
| High school graduate               | 11,158 (40.3)            | 22,610 (40.1)              |                      |
| College degree or higher           | 8,773 (31.6)             | 8,499 (15.1)               |                      |
| Unknown                            | 495 (1.8)                | 1,073 (1.9)                |                      |
| <b>Occupational classification</b> |                          |                            | <0.001               |
| Non-manual                         | 8,335 (30.1)             | 5,674 (10.1)               |                      |
| Manual                             | 13,135 (47.4)            | 14,027 (24.9)              |                      |
| Unemployed / housewives            | 5,443 (19.6)             | 34,906 (61.9)              |                      |
| Unknown                            | 804 (2.9)                | 1,770 (3.1)                |                      |
| <b>Marital status</b>              |                          |                            | <0.001               |
| Married                            | 26,052 (94.0)            | 47,869 (84.9)              |                      |
| Single or separated                | 1,441 (5.2)              | 8,079 (14.3)               |                      |
| Unknown                            | 224 (0.8)                | 429 (0.7)                  |                      |
| <b>Lifestyle factors</b>           |                          |                            |                      |
| <b>Smoking status</b>              |                          |                            | <0.001               |
| Non-current smokers                | 18,997 (68.5)            | 54,654 (96.9)              |                      |
| Current smokers                    | 8,622 (31.1)             | 1,219 (2.2)                |                      |
| Unknown                            | 98 (0.4)                 | 504 (0.9)                  |                      |
| <b>Alcohol consumption</b>         |                          |                            | <0.001               |
| Non-current drinkers               | 7,931 (28.6)             | 39,205 (69.5)              |                      |
| Current drinkers                   | 19,731 (71.2)            | 16,824 (29.8)              |                      |
| Unknown                            | 55 (0.2)                 | 348 (0.6)                  |                      |
| <b>Eating habits</b>               |                          |                            | <0.001               |
| Having three meals a day           | 24,183 (87.3)            | 44,395 (78.7)              |                      |
| Having irregular meals             | 3,457 (12.5)             | 11,843 (21.0)              |                      |
| Unknown                            | 77 (0.3)                 | 139 (0.3)                  |                      |
| <b>Intake of multi vitamin</b>     |                          |                            | <0.001               |
| Multi-vitamin users                | 4,700 (17.0)             | 11,341 (20.1)              |                      |
| Non-users                          | 22,659 (81.7)            | 44,153 (78.3)              |                      |
| Unknown                            | 358 (1.3)                | 883 (1.6)                  |                      |
| <b>Physical activity</b>           |                          |                            | <0.001               |
| Regular exercisers                 | 15,372 (55.5)            | 28,501 (50.6)              |                      |
| Non-exercisers                     | 12,291 (44.3)            | 27,766 (49.3)              |                      |
| Unknown                            | 54 (0.2)                 | 110 (0.2)                  |                      |
| <b>Psychological condition</b>     |                          |                            |                      |
| <b>PWI status<sup>b</sup></b>      |                          |                            | <0.001               |
| Positive wellbeing                 | 3,862 (13.9)             | 5,300 (9.4)                |                      |
| Moderate distress                  | 19,860 (71.7)            | 39,144 (69.4)              |                      |
| Severe distress                    | 2,742 (9.9)              | 8,777 (15.6)               |                      |
| Unknown                            | 1,253 (4.5)              | 3,156 (5.6)                |                      |

|                                                                 |               |               |        |
|-----------------------------------------------------------------|---------------|---------------|--------|
| <b>Stress events</b>                                            |               |               | <0.001 |
| Not at all                                                      | 16,215 (58.5) | 26,150 (46.4) |        |
| Often                                                           | 9,062 (32.7)  | 22,742 (40.3) |        |
| Frequent                                                        | 1,723 (6.2)   | 6,040 (10.7)  |        |
| Unknown                                                         | 717 (2.6)     | 1,445 (2.6)   |        |
| <b>Self-reported health status</b>                              |               |               | <0.001 |
| Healthy                                                         | 12,148 (43.8) | 17,993 (31.9) |        |
| Normal                                                          | 11,356 (41.0) | 25,677 (45.6) |        |
| Unhealthy                                                       | 3,814 (13.8)  | 11,754 (20.9) |        |
| Unknown                                                         | 399 (1.4)     | 953 (1.7)     |        |
| <b>Anthropometry</b>                                            |               |               |        |
| <b>Body mass index (kg/m<sup>2</sup>, mean±SD) <sup>c</sup></b> | 24.4 ± 2.7    | 23.8 ± 2.9    | <0.001 |
| Quartile 1 (Lowest)                                             | 7,000 (25.3)  | 14,447 (25.6) |        |
| Quartile 2                                                      | 7,161 (25.8)  | 13,739 (24.4) |        |
| Quartile 3                                                      | 6,584 (23.8)  | 14,062 (24.9) |        |
| Quartile 4 (Highest)                                            | 6,737 (24.3)  | 13,722 (24.3) |        |
| Unknown                                                         | 235 (0.8)     | 407 (0.7)     |        |
| <b>Waist circumference (cm, mean±SD) <sup>d</sup></b>           | 86.2 ± 7.4    | 79.2 ± 8.1    | <0.001 |
| Quartile 1 (Lowest)                                             | 6,757 (24.4)  | 13,944 (24.7) |        |
| Quartile 2                                                      | 6,885 (24.8)  | 15,246 (27.0) |        |
| Quartile 3                                                      | 6,893 (24.9)  | 12,311 (21.8) |        |
| Quartile 4 (Highest)                                            | 6,482 (23.4)  | 13,789 (24.5) |        |
| Unknown                                                         | 700 (2.5)     | 1,087 (1.9)   |        |

- a. *p*-value was calculated by chi-square test for categorical variables or Student's *t*-test for continuous variables
- b. Defined as positive wellbeing group with PWI score ≤ 8, moderate distress group with 8 < PWI score < 27, and severe distress group with PWI score ≥ 27
- c. Defined as follows: Quartile 1: ≤ 22.6, Quartile 2: 22.6 < BMI ≤ 24.4, Quartile 3: 24.4 < BMI ≤ 26.1, and Quartile 4: 26.1 < BMI in men; and Quartile 1: ≤ 21.8, Quartile 2: 21.8 < BMI ≤ 23.5, Quartile 3: 23.5 < BMI ≤ 25.5, and Quartile 4: 25.5 < BMI in women
- d. Defined as follows: Quartile 1: ≤ 81.3, Quartile 2: 81.3 < WC ≤ 86.0, Quartile 3: 86.0 < BMI ≤ 91.0, and Quartile 4: 91.0 < BMI in men; and Quartile 1: ≤ 73.5, Quartile 2: 73.5 < WC ≤ 79.0, Quartile 3: 79.0 < WC ≤ 84.3, Quartile 4: 84.3 < WC in women
