# Supplementary material for: Correlates of Self-Reported Sleep Duration in Middle-Aged and Elderly Koreans: from the Health Examinees Study
Source: PubMed Central journal article supplement (PMC4416918; doi:10.1371/journal.pone.0123510), 2015-05-01
Supplement: pone.0123510.s002.pdf [file pone.0123510.s002.pdf]

**S2 Table. Prevalence of currently receiving treatment of selected diseases of the study population**

|                                                                             | Men<br>(N=27,717) | Women<br>(N=56,377) | <i>P</i> <sup>a</sup> |
|-----------------------------------------------------------------------------|-------------------|---------------------|-----------------------|
| <i>Certain infectious &amp; parasitic disease</i>                           |                   |                     |                       |
| Tuberculosis, <i>n</i> (%)                                                  | 23 (0.1)          | 28 (0.1)            | < 0.001               |
| <i>Viral infections characterized by skin &amp; mucous membrane lesions</i> |                   |                     |                       |
| Acute liver disease, <i>n</i> (%)                                           | 44 (0.2)          | 28 (0.1)            | < 0.001               |
| Chronic liver disease, <i>n</i> (%)                                         | 273 (1.0)         | 242 (0.4)           | < 0.001               |
| <i>Neoplasms</i>                                                            |                   |                     |                       |
| Cancer, <i>n</i> (%)                                                        | 140 (0.5)         | 409 (0.7)           | < 0.001               |
| <i>Endocrine, nutritional &amp; metabolic disease</i>                       |                   |                     |                       |
| Diabetes mellitus, <i>n</i> (%)                                             | 1,966 (7.1)       | 2,402 (4.3)         | < 0.001               |
| Thyroid disease, <i>n</i> (%)                                               | 143 (0.5)         | 1,228 (2.2)         | < 0.001               |
| Hyperlipidemia, <i>n</i> (%)                                                | 737 (2.7)         | 1,560 (2.7)         | 0.130                 |
| <i>Mental &amp; behavioral disorders</i>                                    |                   |                     |                       |
| Depression, <i>n</i> (%)                                                    | 108 (0.4)         | 461 (0.8)           | < 0.001               |
| <i>Diseases of the eye &amp; adnexa</i>                                     |                   |                     |                       |
| Cataract, <i>n</i> (%)                                                      | 185 (0.7)         | 375 (0.7)           | < 0.001               |
| <i>Diseases of the circulatory system</i>                                   |                   |                     |                       |
| Hypertension, <i>n</i> (%)                                                  | 5,033 (18.2)      | 8,685 (15.4)        | < 0.001               |
| Myocardial infarction, <i>n</i> (%)                                         | 564 (2.0)         | 574 (1.0)           | < 0.001               |
| Stroke, <i>n</i> (%)                                                        | 273 (1.0)         | 268 (0.5)           | < 0.001               |
| <i>Diseases of the respiratory system</i>                                   |                   |                     |                       |
| Asthma / Chronic bronchitis, <i>n</i> (%)                                   | 161 (0.6)         | 318 (0.6)           | 0.616                 |
| <i>Diseases of the digestive system</i>                                     |                   |                     |                       |
| Cholelithiasis, <i>n</i> (%)                                                | 34 (0.1)          | 63 (0.1)            | 0.888                 |
| Fatty liver disease, <i>n</i> (%)                                           | 302 (1.1)         | 222 (0.4)           | < 0.001               |
| Gastritis, <i>n</i> (%)                                                     | 416 (1.5)         | 1,050 (1.9)         | < 0.001               |
| Intestinal polyp, <i>n</i> (%)                                              | 33 (0.1)          | 31 (0.1)            | < 0.001               |
| Peptic Ulcer, <i>n</i> (%)                                                  | 285 (1.0)         | 464 (0.8)           | 0.012                 |
| <i>Diseases of the musculo-skeletal system &amp; connective tissue</i>      |                   |                     |                       |
| Arthritis, <i>n</i> (%)                                                     | 350 (1.3)         | 2,871 (5.1)         | < 0.001               |
| Osteoporosis, <i>n</i> (%)                                                  | 45 (0.2)          | 1,667 (3.0)         | < 0.001               |
| <i>Diseases of the genitourinary system</i>                                 |                   |                     |                       |
| Bladder infection, <i>n</i> (%)                                             | 33 (0.1)          | 225 (0.4)           | < 0.001               |

a. *p*-value was calculated by chi-square test for categorical variable
