# Supplementary material for: Correlates of Self-Reported Sleep Duration in Middle-Aged and Elderly Koreans: from the Health Examinees Study
Source: PubMed Central journal article supplement (PMC4416918; doi:10.1371/journal.pone.0123510), 2015-05-01
Supplement: pone.0123510.s003.pdf [file pone.0123510.s003.pdf]

**S3 Table. Phase sensitivity analysis among men: odd ratios (95% CIs) <sup>a</sup> for short or long sleep duration compared to normal sleep duration (6-7 hours) according to selected correlates**

|                                    | Sensitivity analysis I <sup>a</sup> (N=20,923) |                            |                           | Sensitivity analysis II <sup>b</sup> (N=20,731) |                            |                           | Sensitivity analysis III <sup>c</sup> (N=19,617) |                            |                           |
|------------------------------------|------------------------------------------------|----------------------------|---------------------------|-------------------------------------------------|----------------------------|---------------------------|--------------------------------------------------|----------------------------|---------------------------|
|                                    | < 6 hours<br>OR (95% CI)                       | 8 - 9 hours<br>OR (95% CI) | ≥ 10 hours<br>OR (95% CI) | < 6 hours<br>OR (95% CI)                        | 8 - 9 hours<br>OR (95% CI) | ≥ 10 hours<br>OR (95% CI) | < 6 hours<br>OR (95% CI)                         | 8 - 9 hours<br>OR (95% CI) | ≥ 10 hours<br>OR (95% CI) |
| <b>Sociodemographic factors</b>    |                                                |                            |                           |                                                 |                            |                           |                                                  |                            |                           |
| <b>Age (years)</b>                 |                                                |                            |                           |                                                 |                            |                           |                                                  |                            |                           |
| 40-49                              | 1.00 (Ref.)                                    | 1.00 (Ref.)                | 1.00 (Ref.)               | 1.00 (Ref.)                                     | 1.00 (Ref.)                | 1.00 (Ref.)               | 1.00 (Ref.)                                      | 1.00 (Ref.)                | 1.00 (Ref.)               |
| 50-59                              | 1.07 (0.96-1.20)                               | 1.09 (1.01-1.18)           | 1.61 (1.22-2.14)          | 1.08 (0.96-1.21)                                | 1.09 (1.01-1.18)           | 1.63 (1.24-2.17)          | 1.09 (0.97-1.22)                                 | 1.08 (0.99-1.17)           | 1.68 (1.26-2.24)          |
| 60-69                              | 1.65 (1.44-1.89)                               | 1.06 (0.95-1.17)           | 1.96 (1.42-2.70)          | 1.65 (1.44-1.66)                                | 1.06 (0.96-1.17)           | 2.01 (1.46-2.78)          | 1.61 (1.40-1.86)                                 | 1.03 (0.92-1.14)           | 2.00 (1.43-2.80)          |
| <b>Educational attainment</b>      |                                                |                            |                           |                                                 |                            |                           |                                                  |                            |                           |
| College degree or higher           | 1.00 (Ref.)                                    | 1.00 (Ref.)                | 1.00 (Ref.)               | 1.00 (Ref.)                                     | 1.00 (Ref.)                | 1.00 (Ref.)               | 1.00 (Ref.)                                      | 1.00 (Ref.)                | 1.00 (Ref.)               |
| High school graduate               | 1.12 (0.99-1.27)                               | 1.30 (1.20-1.42)           | 1.67 (1.20-2.33)          | 1.13 (1.00-1.28)                                | 1.30 (1.19-1.42)           | 1.65 (1.18-2.31)          | 1.12 (0.98-1.27)                                 | 1.31 (1.19-1.43)           | 1.71 (1.21-2.42)          |
| Middle school or below             | 1.43 (1.24-1.65)                               | 1.57 (1.42-1.75)           | 2.65 (1.87-3.77)          | 1.44 (1.24-1.66)                                | 1.57 (1.42-1.75)           | 2.53 (1.78-3.61)          | 1.45 (1.25-1.68)                                 | 1.61 (1.44-1.79)           | 2.59 (1.79-3.73)          |
| <b>Occupational classification</b> |                                                |                            |                           |                                                 |                            |                           |                                                  |                            |                           |
| Non-manual                         | 1.00 (Ref.)                                    | 1.00 (Ref.)                | 1.00 (Ref.)               | 1.00 (Ref.)                                     | 1.00 (Ref.)                | 1.00 (Ref.)               | 1.00 (Ref.)                                      | 1.00 (Ref.)                | 1.00 (Ref.)               |
| Manual                             | 1.14 (1.01-1.30)                               | 1.15 (1.05-1.25)           | 1.59 (1.14-2.24)          | 1.14 (1.01-1.30)                                | 1.15 (1.05-1.26)           | 1.61 (1.15-2.26)          | 1.15 (1.01-1.30)                                 | 1.14 (1.04-1.25)           | 1.68 (1.19-2.39)          |
| Unemployed / housewives            | 1.02 (0.87-1.20)                               | 1.44 (1.29-1.61)           | 2.39 (1.63-3.50)          | 1.02 (0.87-1.20)                                | 1.45 (1.20-1.62)           | 2.32 (1.58-3.41)          | 1.02 (0.86-1.21)                                 | 1.44 (1.27-1.61)           | 2.38 (1.60-3.54)          |
| <b>Marital status</b>              |                                                |                            |                           |                                                 |                            |                           |                                                  |                            |                           |
| Married                            | 1.00 (Ref.)                                    | 1.00 (Ref.)                | 1.00 (Ref.)               | 1.00 (Ref.)                                     | 1.00 (Ref.)                | 1.00 (Ref.)               | 1.00 (Ref.)                                      | 1.00 (Ref.)                | 1.00 (Ref.)               |
| Single or separated                | 1.23 (1.02-1.48)                               | 0.86 (0.74-1.01)           | 0.96 (0.63-1.48)          | 1.23 (1.02-1.49)                                | 0.86 (0.74-1.01)           | 0.96 (0.62-1.49)          | 1.25 (1.03-1.52)                                 | 0.90 (0.76-1.05)           | 0.87 (0.54-1.39)          |
| <b>Menopausal status</b>           |                                                |                            |                           |                                                 |                            |                           |                                                  |                            |                           |
| Premenopausal                      | -                                              | -                          | -                         | -                                               | -                          | -                         | -                                                | -                          | -                         |
| Postmenopausal                     | -                                              | -                          | -                         | -                                               | -                          | -                         | -                                                | -                          | -                         |
| <b>Lifestyle factors</b>           |                                                |                            |                           |                                                 |                            |                           |                                                  |                            |                           |
| <b>Smoking status</b>              |                                                |                            |                           |                                                 |                            |                           |                                                  |                            |                           |
| Non-current smokers                | 1.00 (Ref.)                                    | 1.00 (Ref.)                | 1.00 (Ref.)               | 1.00 (Ref.)                                     | 1.00 (Ref.)                | 1.00 (Ref.)               | 1.00 (Ref.)                                      | 1.00 (Ref.)                | 1.00 (Ref.)               |
| Current smokers                    | 0.97 (0.88-1.08)                               | 1.04 (0.97-1.12)           | 1.35 (1.08-1.69)          | 0.97 (0.88-1.08)                                | 1.05 (0.97-1.13)           | 1.34 (1.07-1.68)          | 0.96 (0.86-1.07)                                 | 1.04 (0.96-1.12)           | 1.35 (1.07-1.70)          |
| <b>Alcohol consumption</b>         |                                                |                            |                           |                                                 |                            |                           |                                                  |                            |                           |
| Non-current drinkers               | 1.00 (Ref.)                                    | 1.00 (Ref.)                | 1.00 (Ref.)               | 1.00 (Ref.)                                     | 1.00 (Ref.)                | 1.00 (Ref.)               | 1.00 (Ref.)                                      | 1.00 (Ref.)                | 1.00 (Ref.)               |
| Current drinkers                   | 0.90 (0.81-1.00)                               | 0.96 (0.89-1.04)           | 1.05 (0.83-1.33)          | 0.90 (0.81-1.00)                                | 0.96 (0.89-1.04)           | 1.09 (0.85-1.39)          | 0.90 (0.81-1.01)                                 | 0.98 (0.90-1.06)           | 1.07 (0.83-1.38)          |
| <b>Eating habits</b>               |                                                |                            |                           |                                                 |                            |                           |                                                  |                            |                           |
| Having three meals a day           | 1.00 (Ref.)                                    | 1.00 (Ref.)                | 1.00 (Ref.)               | 1.00 (Ref.)                                     | 1.00 (Ref.)                | 1.00 (Ref.)               | 1.00 (Ref.)                                      | 1.00 (Ref.)                | 1.00 (Ref.)               |
| Having irregular meals             | 1.51 (1.33-1.72)                               | 0.99 (0.89-1.10)           | 1.94 (1.48-2.53)          | 1.50 (1.32-1.71)                                | 0.99 (0.89-1.10)           | 1.99 (1.52-2.60)          | 1.51 (1.33-1.73)                                 | 0.97 (0.87-1.08)           | 1.97 (1.50-2.60)          |
| <b>Intake of multi vitamin</b>     |                                                |                            |                           |                                                 |                            |                           |                                                  |                            |                           |
| Multi-vitamin users                | 1.00 (Ref.)                                    | 1.00 (Ref.)                | 1.00 (Ref.)               | 1.00 (Ref.)                                     | 1.00 (Ref.)                | 1.00 (Ref.)               | 1.00 (Ref.)                                      | 1.00 (Ref.)                | 1.00 (Ref.)               |
| Non-users                          | 1.02 (0.90-1.16)                               | 0.95 (0.87-1.04)           | 1.51 (1.06-2.15)          | 1.02 (0.90-1.16)                                | 0.95 (0.87-1.04)           | 1.47 (1.03-2.10)          | 1.01 (0.89-1.17)                                 | 0.96 (0.87-1.05)           | 1.45 (1.01-2.08)          |
| <b>Physical activity</b>           |                                                |                            |                           |                                                 |                            |                           |                                                  |                            |                           |
| Regular exercisers                 | 1.00 (Ref.)                                    | 1.00 (Ref.)                | 1.00 (Ref.)               | 1.00 (Ref.)                                     | 1.00 (Ref.)                | 1.00 (Ref.)               | 1.00 (Ref.)                                      | 1.00 (Ref.)                | 1.00 (Ref.)               |
| Non-exercisers                     | 1.07 (0.97-1.18)                               | 1.05 (0.98-1.12)           | 1.68 (1.34-2.11)          | 1.06 (0.96-1.17)                                | 1.05 (0.98-1.13)           | 1.72 (1.36-2.16)          | 1.05 (0.95-1.17)                                 | 1.05 (0.97-1.12)           | 1.67 (1.31-2.11)          |

| <b>Psychological condition</b>                        |                  |                  |                  |                  |                  |                  |                  |                  |                  |
|-------------------------------------------------------|------------------|------------------|------------------|------------------|------------------|------------------|------------------|------------------|------------------|
| <b>PWI status<sup>e</sup></b>                         |                  |                  |                  |                  |                  |                  |                  |                  |                  |
| Positive wellbeing                                    | 1.00 (Ref.)      | 1.00 (Ref.)      | 1.00 (Ref.)      | 1.00 (Ref.)      | 1.00 (Ref.)      | 1.00 (Ref.)      | 1.00 (Ref.)      | 1.00 (Ref.)      | 1.00 (Ref.)      |
| Moderate distress                                     | 0.91 (0.79-1.06) | 0.89 (0.81-0.99) | 0.73 (0.54-1.00) | 0.91 (0.79-1.05) | 0.89 (0.80-0.98) | 0.74 (0.54-1.01) | 0.92 (0.79-1.06) | 0.89 (0.80-0.99) | 0.74 (0.54-1.02) |
| Severe distress                                       | 1.28 (1.04-1.58) | 0.99 (0.85-1.16) | 0.93 (0.59-1.46) | 1.28 (1.04-1.58) | 0.98 (0.84-1.15) | 0.89 (0.57-1.41) | 1.31 (1.05-1.62) | 1.03 (0.87-1.21) | 0.89 (0.56-1.43) |
| <b>Stress events</b>                                  |                  |                  |                  |                  |                  |                  |                  |                  |                  |
| Not at all                                            | 1.00 (Ref.)      | 1.00 (Ref.)      | 1.00 (Ref.)      | 1.00 (Ref.)      | 1.00 (Ref.)      | 1.00 (Ref.)      | 1.00 (Ref.)      | 1.00 (Ref.)      | 1.00 (Ref.)      |
| Often                                                 | 1.17 (1.05-1.30) | 0.90 (0.84-0.97) | 0.92 (0.72-1.17) | 1.17 (1.05-1.30) | 0.90 (0.84-0.97) | 0.91 (0.71-1.17) | 1.19 (1.07-1.33) | 0.91 (0.84-0.98) | 0.91 (0.71-1.18) |
| Frequent                                              | 1.77 (1.48-2.12) | 0.93 (0.79-1.09) | 1.16 (0.77-1.75) | 1.76 (1.47-2.10) | 0.93 (0.79-1.08) | 1.17 (0.77-1.77) | 1.70 (1.41-2.06) | 0.92 (0.78-1.09) | 1.09 (0.70-1.69) |
| <b>Self-reported health status</b>                    |                  |                  |                  |                  |                  |                  |                  |                  |                  |
| Healthy                                               | 1.00 (Ref.)      | 1.00 (Ref.)      | 1.00 (Ref.)      | 1.00 (Ref.)      | 1.00 (Ref.)      | 1.00 (Ref.)      | 1.00 (Ref.)      | 1.00 (Ref.)      | 1.00 (Ref.)      |
| Normal                                                | 0.90 (0.81-1.00) | 0.99 (0.92-1.07) | 1.10 (0.86-1.41) | 0.91 (0.81-1.01) | 0.99 (0.92-1.07) | 1.11 (0.87-1.42) | 0.89 (0.80-1.00) | 0.99 (0.91-1.07) | 1.11 (0.87-1.43) |
| Unhealthy                                             | 1.26 (1.08-1.47) | 1.07 (0.95-1.21) | 1.47 (1.04-2.06) | 1.28 (1.09-1.50) | 1.07 (0.94-1.21) | 1.45 (1.02-2.06) | 1.24 (1.05-1.47) | 1.04 (0.92-1.19) | 1.49 (1.03-2.14) |
| <b>Anthropometry</b>                                  |                  |                  |                  |                  |                  |                  |                  |                  |                  |
| <b>Body mass index<sup>f</sup> (kg/m<sup>2</sup>)</b> |                  |                  |                  |                  |                  |                  |                  |                  |                  |
| Quartile 1 (Lowest)                                   | 1.00 (0.87-1.16) | 1.05 (0.95-1.16) | 0.78 (0.95-1.16) | 1.00 (0.87-1.16) | 1.04 (0.94-1.15) | 0.76 (0.54-1.07) | 1.01 (0.87-1.18) | 1.04 (0.94-1.15) | 0.76 (0.53-1.07) |
| Quartile 2                                            | 1.00 (Ref.)      | 1.00 (Ref.)      | 1.00 (Ref.)      | 1.00 (Ref.)      | 1.00 (Ref.)      | 1.00 (Ref.)      | 1.00 (Ref.)      | 1.00 (Ref.)      | 1.00 (Ref.)      |
| Quartile 3                                            | 1.12 (0.97-1.30) | 0.97 (0.88-1.07) | 0.99 (0.73-1.34) | 1.12 (0.97-1.29) | 0.96 (0.87-1.06) | 0.98 (0.72-1.33) | 1.11 (0.96-1.29) | 0.96 (0.86-1.06) | 0.97 (0.71-1.33) |
| Quartile 4 (Highest)                                  | 1.39 (1.18-1.64) | 0.88 (0.78-0.99) | 0.68 (0.47-0.99) | 1.39 (1.18-1.64) | 0.87 (0.77-0.98) | 0.68 (0.47-0.99) | 1.38 (1.16-1.63) | 0.87 (0.77-0.98) | 0.71 (0.48-1.04) |
| <b>Waist circumference<sup>g</sup> (cm)</b>           |                  |                  |                  |                  |                  |                  |                  |                  |                  |
| Quartile 1 (Lowest)                                   | 1.02 (0.89-1.18) | 0.91 (0.82-1.00) | 0.92 (0.65-1.30) | 1.03 (0.89-1.19) | 0.91 (0.82-1.00) | 0.94 (0.67-1.34) | 0.99 (0.85-1.15) | 0.89 (0.81-0.99) | 0.88 (0.62-1.26) |
| Quartile 2                                            | 1.00 (Ref.)      | 1.00 (Ref.)      | 1.00 (Ref.)      | 1.00 (Ref.)      | 1.00 (Ref.)      | 1.00 (Ref.)      | 1.00 (Ref.)      | 1.00 (Ref.)      | 1.00 (Ref.)      |
| Quartile 3                                            | 0.88 (0.76-1.01) | 0.94 (0.85-1.03) | 1.08 (0.78-1.48) | 0.88 (0.76-1.01) | 0.93 (0.84-1.03) | 1.11 (0.80-1.53) | 0.89 (0.77-1.03) | 0.93 (0.84-1.03) | 1.03 (0.74-1.44) |
| Quartile 4 (Highest)                                  | 0.87 (0.73-1.03) | 1.10 (0.98-1.24) | 1.65 (1.15-2.37) | 0.87 (0.73-1.03) | 1.10 (0.97-1.24) | 1.67 (1.15-2.41) | 0.88 (0.74-1.05) | 1.10 (0.98-1.25) | 1.60 (1.09-2.32) |

Note: Unknown values were wholly included in the statistical models but were not presented in the table

- All ORs were adjusted for sociodemographic factors (*i.e.*, age, education attainment, occupational classification, marital status, and menopausal status only for women), lifestyle factors (*i.e.*, smoking status, alcohol consumption, eating habits, intake of multi vitamin, and physical activity), psychological condition (*i.e.*, PWI status, stress events, and self-reported health status), and anthropometry (*i.e.*, body mass index and waist circumference)
- Subjects who were currently taking any medications for diabetes mellitus, depression, hypertension, stroke, peptic ulcer, and arthritis were excluded from the primary analysis
- According to sex strata, men who were currently taking any medications for cancer, diabetes mellitus, thyroid disease, depression, hypertension, stroke, peptic ulcer, and arthritis were excluded from the primary analysis
- Subjects who were currently taking any medications for selected diseases were wholly excluded from the primary analysis
- Defined as positive wellbeing group with PWI score  $\leq 8$ , moderate distress group with  $8 < \text{PWI score} < 27$ , and severe distress group with PWI score  $\geq 27$
- Defined as follows: Quartile 1:  $\leq 22.6$ , Quartile 2:  $22.6 < \text{BMI} \leq 24.4$ , Quartile 3:  $24.4 < \text{BMI} \leq 26.1$ , and Quartile 4:  $26.1 < \text{BMI}$  in men
- Defined as follows: Quartile 1:  $\leq 81.3$ , Quartile 2:  $81.3 < \text{WC} \leq 86.0$ , Quartile 3:  $86.0 < \text{WC} \leq 91.0$ , and Quartile 4:  $91.0 < \text{WC}$  in men
