# Supplementary material for: Correlates of Self-Reported Sleep Duration in Middle-Aged and Elderly Koreans: from the Health Examinees Study
Source: PubMed Central journal article supplement (PMC4416918; doi:10.1371/journal.pone.0123510), 2015-05-01
Supplement: pone.0123510.s004.pdf [file pone.0123510.s004.pdf]

**S4 Table. Phase sensitivity analysis among women: odd ratios (95% CIs) <sup>a</sup> for short or long sleep duration compared to normal sleep duration (6-7 hours) according to selected correlates**

|                                    | Sensitivity analysis I <sup>a</sup> (N=43,670) |                            |                           | Sensitivity analysis II <sup>b</sup> (N=41,167) |                            |                           | Sensitivity analysis III <sup>c</sup> (N=39,951) |                            |                           |
|------------------------------------|------------------------------------------------|----------------------------|---------------------------|-------------------------------------------------|----------------------------|---------------------------|--------------------------------------------------|----------------------------|---------------------------|
|                                    | < 6 hours<br>OR (95% CI)                       | 8 - 9 hours<br>OR (95% CI) | ≥ 10 hours<br>OR (95% CI) | < 6 hours<br>OR (95% CI)                        | 8 - 9 hours<br>OR (95% CI) | ≥ 10 hours<br>OR (95% CI) | < 6 hours<br>OR (95% CI)                         | 8 - 9 hours<br>OR (95% CI) | ≥ 10 hours<br>OR (95% CI) |
| <b>Sociodemographic factors</b>    |                                                |                            |                           |                                                 |                            |                           |                                                  |                            |                           |
| <b>Age (years)</b>                 |                                                |                            |                           |                                                 |                            |                           |                                                  |                            |                           |
| 40-49                              | 1.00 (Ref.)                                    | 1.00 (Ref.)                | 1.00 (Ref.)               | 1.00 (Ref.)                                     | 1.00 (Ref.)                | 1.00 (Ref.)               | 1.00 (Ref.)                                      | 1.00 (Ref.)                | 1.00 (Ref.)               |
| 50-59                              | 1.24 (1.13-1.36)                               | 0.80 (0.75-0.85)           | 0.63 (0.52-0.76)          | 1.23 (1.13-1.35)                                | 0.80 (0.75-0.85)           | 0.62 (0.51-0.76)          | 1.23 (1.12-1.35)                                 | 0.80 (0.75-0.86)           | 0.59 (0.48-0.73)          |
| 60-69                              | 1.88 (1.67-2.10)                               | 0.74 (0.68-0.81)           | 0.52 (0.39-0.70)          | 1.84 (1.63-2.07)                                | 0.74 (0.67-0.81)           | 0.51 (0.38-0.69)          | 1.84 (1.63-2.08)                                 | 0.74 (0.68-0.82)           | 0.49 (0.36-0.67)          |
| <b>Educational attainment</b>      |                                                |                            |                           |                                                 |                            |                           |                                                  |                            |                           |
| College degree or higher           | 1.00 (Ref.)                                    | 1.00 (Ref.)                | 1.00 (Ref.)               | 1.00 (Ref.)                                     | 1.00 (Ref.)                | 1.00 (Ref.)               | 1.00 (Ref.)                                      | 1.00 (Ref.)                | 1.00 (Ref.)               |
| High school graduate               | 1.08 (0.97-1.20)                               | 1.05 (0.98-1.12)           | 1.60 (1.26-2.04)          | 1.05 (0.95-1.17)                                | 1.05 (0.98-1.12)           | 1.56 (1.22-2.00)          | 1.05 (0.95-1.17)                                 | 1.04 (0.97-1.12)           | 1.60 (1.24-2.05)          |
| Middle school or below             | 1.35 (1.21-1.51)                               | 1.12 (1.03-1.21)           | 2.16 (1.66-2.80)          | 1.33 (1.19-1.49)                                | 1.12 (1.04-1.21)           | 2.08 (1.60-2.71)          | 1.33 (1.19-1.49)                                 | 1.11 (1.03-1.20)           | 2.15 (1.64-2.81)          |
| <b>Occupational classification</b> |                                                |                            |                           |                                                 |                            |                           |                                                  |                            |                           |
| Non-manual                         | 1.00 (Ref.)                                    | 1.00 (Ref.)                | 1.00 (Ref.)               | 1.00 (Ref.)                                     | 1.00 (Ref.)                | 1.00 (Ref.)               | 1.00 (Ref.)                                      | 1.00 (Ref.)                | 1.00 (Ref.)               |
| Manual                             | 1.15 (1.02-1.29)                               | 1.23 (1.12-1.35)           | 1.28 (0.90-1.82)          | 1.15 (1.01-1.30)                                | 1.23 (1.12-1.35)           | 1.27 (0.88-1.81)          | 1.15 (1.01-1.30)                                 | 1.24 (1.13-1.36)           | 1.25 (0.87-1.80)          |
| Unemployed / housewives            | 1.03 (0.92-1.16)                               | 1.79 (1.65-1.94)           | 2.87 (2.08-3.97)          | 1.03 (0.92-1.15)                                | 1.80 (1.65-1.95)           | 2.91 (2.10-4.04)          | 1.03 (1.65-1.95)                                 | 1.79 (1.65-1.95)           | 2.87 (2.06-4.00)          |
| <b>Marital status</b>              |                                                |                            |                           |                                                 |                            |                           |                                                  |                            |                           |
| Married                            | 1.00 (Ref.)                                    | 1.00 (Ref.)                | 1.00 (Ref.)               | 1.00 (Ref.)                                     | 1.00 (Ref.)                | 1.00 (Ref.)               | 1.00 (Ref.)                                      | 1.00 (Ref.)                | 1.00 (Ref.)               |
| Single or separated                | 1.18 (1.08-1.28)                               | 0.99 (0.92-1.06)           | 1.05 (0.85-1.31)          | 1.17 (1.07-1.28)                                | 1.00 (0.93-1.07)           | 1.04 (0.83-1.30)          | 1.17 (1.07-1.28)                                 | 1.00 (0.92-1.08)           | 1.06 (0.84-1.33)          |
| <b>Menopausal status</b>           |                                                |                            |                           |                                                 |                            |                           |                                                  |                            |                           |
| Premenopausal                      | 1.00 (Ref.)                                    | 1.00 (Ref.)                | 1.00 (Ref.)               | 1.00 (Ref.)                                     | 1.00 (Ref.)                | 1.00 (Ref.)               | 1.00 (Ref.)                                      | 1.00 (Ref.)                | 1.00 (Ref.)               |
| Postmenopausal                     | 1.12 (1.02-1.22)                               | 0.89 (0.83-0.95)           | 0.82 (0.68-1.00)          | 1.13 (1.03-1.24)                                | 0.89 (0.84-0.95)           | 0.83 (0.68-1.01)          | 1.12 (1.02-1.23)                                 | 0.89 (0.83-0.95)           | 0.86 (0.70-1.06)          |
| <b>Lifestyle factors</b>           |                                                |                            |                           |                                                 |                            |                           |                                                  |                            |                           |
| <b>Smoking status</b>              |                                                |                            |                           |                                                 |                            |                           |                                                  |                            |                           |
| Non-current smokers                | 1.00 (Ref.)                                    | 1.00 (Ref.)                | 1.00 (Ref.)               | 1.00 (Ref.)                                     | 1.00 (Ref.)                | 1.00 (Ref.)               | 1.00 (Ref.)                                      | 1.00 (Ref.)                | 1.00 (Ref.)               |
| Current smokers                    | 1.10 (0.91-1.34)                               | 1.09 (0.93-1.28)           | 1.13 (0.75-1.73)          | 1.14 (0.94-1.39)                                | 1.08 (0.92-1.27)           | 1.21 (0.79-1.84)          | 1.17 (0.96-1.43)                                 | 1.09 (0.93-1.28)           | 1.26 (0.82-1.92)          |
| <b>Alcohol consumption</b>         |                                                |                            |                           |                                                 |                            |                           |                                                  |                            |                           |
| Non-current drinkers               | 1.00 (Ref.)                                    | 1.00 (Ref.)                | 1.00 (Ref.)               | 1.00 (Ref.)                                     | 1.00 (Ref.)                | 1.00 (Ref.)               | 1.00 (Ref.)                                      | 1.00 (Ref.)                | 1.00 (Ref.)               |
| Current drinkers                   | 1.00 (0.94-1.07)                               | 1.00 (0.95-1.05)           | 0.92 (0.79-1.07)          | 1.01 (0.94-1.08)                                | 1.00 (0.95-1.06)           | 0.93 (0.80-1.09)          | 1.00 (0.93-1.08)                                 | 1.00 (0.95-1.06)           | 0.91 (0.77-1.06)          |
| <b>Eating habits</b>               |                                                |                            |                           |                                                 |                            |                           |                                                  |                            |                           |
| Having three meals a day           | 1.00 (Ref.)                                    | 1.00 (Ref.)                | 1.00 (Ref.)               | 1.00 (Ref.)                                     | 1.00 (Ref.)                | 1.00 (Ref.)               | 1.00 (Ref.)                                      | 1.00 (Ref.)                | 1.00 (Ref.)               |
| Having irregular meals             | 1.53 (1.42-1.64)                               | 1.04 (0.98-1.10)           | 1.66 (1.42-1.94)          | 1.52 (1.41-1.63)                                | 1.03 (0.98-1.10)           | 1.65 (1.41-1.93)          | 1.51 (1.41-1.63)                                 | 1.04 (0.98-1.10)           | 1.65 (1.41-1.94)          |
| <b>Intake of multi vitamin</b>     |                                                |                            |                           |                                                 |                            |                           |                                                  |                            |                           |
| Multi-vitamin users                | 1.00 (Ref.)                                    | 1.00 (Ref.)                | 1.00 (Ref.)               | 1.00 (Ref.)                                     | 1.00 (Ref.)                | 1.00 (Ref.)               | 1.00 (Ref.)                                      | 1.00 (Ref.)                | 1.00 (Ref.)               |
| Non-users                          | 1.07 (0.99-1.16)                               | 1.08 (1.02-1.14)           | 1.04 (0.87-1.25)          | 1.08 (0.99-1.17)                                | 1.08 (1.02-1.15)           | 1.05 (0.87-1.27)          | 1.09 (1.00-1.18)                                 | 1.09 (1.03-1.16)           | 1.03 (0.85-1.25)          |
| <b>Physical activity</b>           |                                                |                            |                           |                                                 |                            |                           |                                                  |                            |                           |
| Regular exercisers                 | 1.00 (Ref.)                                    | 1.00 (Ref.)                | 1.00 (Ref.)               | 1.00 (Ref.)                                     | 1.00 (Ref.)                | 1.00 (Ref.)               | 1.00 (Ref.)                                      | 1.00 (Ref.)                | 1.00 (Ref.)               |
| Non-exercisers                     | 1.04 (0.98-1.11)                               | 1.07 (1.02-1.12)           | 1.21 (1.05-1.39)          | 1.05 (0.99-1.12)                                | 1.07 (1.02-1.12)           | 1.23 (1.06-1.84)          | 1.06 (0.99-1.13)                                 | 1.08 (1.03-1.13)           | 1.22 (1.05-1.42)          |

| <b>Psychological condition</b>                        |                  |                  |                  |                  |                  |                  |                  |                  |                  |
|-------------------------------------------------------|------------------|------------------|------------------|------------------|------------------|------------------|------------------|------------------|------------------|
| <b>PWI status<sup>e</sup></b>                         |                  |                  |                  |                  |                  |                  |                  |                  |                  |
| Positive wellbeing                                    | 1.00 (Ref.)      | 1.00 (Ref.)      | 1.00 (Ref.)      | 1.00 (Ref.)      | 1.00 (Ref.)      | 1.00 (Ref.)      | 1.00 (Ref.)      | 1.00 (Ref.)      | 1.00 (Ref.)      |
| Moderate distress                                     | 1.00 (0.90-1.12) | 0.89 (0.82-0.96) | 0.93 (0.72-1.21) | 1.04 (0.92-1.17) | 0.89 (0.83-0.97) | 0.93 (0.71-1.22) | 1.04 (0.92-1.17) | 0.89 (0.83-0.97) | 0.94 (0.72-1.24) |
| Severe distress                                       | 1.22 (1.06-1.40) | 0.90 (0.82-1.00) | 1.39 (1.01-1.90) | 1.25 (1.09-1.45) | 0.91 (0.82-1.01) | 1.39 (1.00-1.92) | 1.23 (1.06-1.43) | 0.89 (0.80-0.99) | 1.41 (1.01-1.95) |
| <b>Stress events</b>                                  |                  |                  |                  |                  |                  |                  |                  |                  |                  |
| Not at all                                            | 1.00 (Ref.)      | 1.00 (Ref.)      | 1.00 (Ref.)      | 1.00 (Ref.)      | 1.00 (Ref.)      | 1.00 (Ref.)      | 1.00 (Ref.)      | 1.00 (Ref.)      | 1.00 (Ref.)      |
| Often                                                 | 1.13 (1.06-1.21) | 0.87 (0.83-0.92) | 0.92 (0.78-1.07) | 1.12 (1.05-1.21) | 0.87 (0.82-0.91) | 0.97 (0.82-1.13) | 1.13 (1.05-1.21) | 0.87 (0.83-0.92) | 0.96 (0.81-1.12) |
| Frequent                                              | 1.56 (1.41-1.72) | 0.87 (0.80-0.96) | 0.84 (0.65-1.09) | 1.53 (1.37-1.70) | 0.86 (0.78-0.94) | 0.84 (0.64-1.10) | 1.54 (1.38-1.71) | 0.87 (0.79-0.95) | 0.85 (0.64-1.12) |
| <b>Self-reported health status</b>                    |                  |                  |                  |                  |                  |                  |                  |                  |                  |
| Healthy                                               | 1.00 (Ref.)      | 1.00 (Ref.)      | 1.00 (Ref.)      | 1.00 (Ref.)      | 1.00 (Ref.)      | 1.00 (Ref.)      | 1.00 (Ref.)      | 1.00 (Ref.)      | 1.00 (Ref.)      |
| Normal                                                | 1.02 (0.95-1.09) | 0.99 (0.94-1.04) | 1.10 (0.85-1.20) | 1.03 (0.95-1.11) | 1.00 (0.95-1.06) | 1.03 (0.86-1.22) | 1.03 (0.95-1.11) | 1.00 (0.95-1.06) | 1.04 (0.87-1.23) |
| Unhealthy                                             | 1.40 (1.27-1.54) | 1.19 (1.11-1.28) | 1.58 (1.28-1.96) | 1.42 (1.29-1.57) | 1.21 (1.12-1.31) | 1.59 (1.27-1.98) | 1.44 (1.30-1.59) | 1.20 (1.11-1.30) | 1.58 (1.26-1.99) |
| <b>Anthropometry</b>                                  |                  |                  |                  |                  |                  |                  |                  |                  |                  |
| <b>Body mass index<sup>f</sup> (kg/m<sup>2</sup>)</b> |                  |                  |                  |                  |                  |                  |                  |                  |                  |
| Quartile 1 (Lowest)                                   | 1.01 (0.92-1.10) | 1.03 (0.96-1.10) | 0.90 (0.74-1.11) | 1.00 (0.91-1.09) | 1.02 (0.95-1.09) | 0.88 (0.71-1.09) | 1.01 (0.91-1.11) | 1.02 (0.95-1.10) | 0.89 (0.72-1.11) |
| Quartile 2                                            | 1.00 (Ref.)      | 1.00 (Ref.)      | 1.00 (Ref.)      | 1.00 (Ref.)      | 1.00 (Ref.)      | 1.00 (Ref.)      | 1.00 (Ref.)      | 1.00 (Ref.)      | 1.00 (Ref.)      |
| Quartile 3                                            | 0.99 (0.91-1.08) | 1.03 (0.96-1.10) | 0.94 (0.77-1.16) | 0.98 (0.89-1.07) | 1.01 (0.95-1.08) | 0.91 (0.73-1.12) | 0.99 (0.90-1.09) | 1.02 (0.95-1.09) | 0.94 (0.76-1.16) |
| Quartile 4 (Highest)                                  | 1.11 (1.00-1.24) | 1.00 (0.92-1.09) | 1.00 (0.78-1.28) | 1.12 (1.00-1.25) | 0.99 (0.91-1.08) | 1.04 (0.81-1.34) | 1.14 (1.02-1.28) | 1.00 (0.92-1.09) | 1.07 (0.82-1.38) |
| <b>Waist circumference<sup>g</sup> (cm)</b>           |                  |                  |                  |                  |                  |                  |                  |                  |                  |
| Quartile 1 (Lowest)                                   | 1.05 (0.96-1.16) | 0.96 (0.90-1.02) | 0.95 (0.77-1.16) | 1.05 (0.96-1.15) | 0.96 (0.90-1.03) | 0.94 (0.77-1.16) | 1.06 (0.96-1.16) | 0.96 (0.90-1.03) | 0.95 (0.77-1.18) |
| Quartile 2                                            | 1.00 (Ref.)      | 1.00 (Ref.)      | 1.00 (Ref.)      | 1.00 (Ref.)      | 1.00 (Ref.)      | 1.00 (Ref.)      | 1.00 (Ref.)      | 1.00 (Ref.)      | 1.00 (Ref.)      |
| Quartile 3                                            | 1.03 (0.94-1.13) | 0.99 (0.9301.06) | 0.98 (0.79-1.21) | 1.04 (0.95-1.15) | 1.00 (0.93-1.07) | 0.96 (0.78-1.20) | 1.04 (0.94-1.14) | 1.00 (0.93-1.07) | 0.95 (0.76-1.18) |
| Quartile 4 (Highest)                                  | 0.96 (0.86-1.07) | 1.03 (0.95-1.12) | 1.04 (0.81-1.33) | 0.95 (0.85-1.07) | 1.04 (0.95-1.13) | 0.98 (0.76-1.27) | 0.95 (0.85-1.07) | 1.03 (0.95-1.12) | 0.97 (0.75-1.26) |

Note: Unknown values were wholly included in the statistical models but were not presented in the table

- All ORs were adjusted for sociodemographic factors (*i.e.*, age, education attainment, occupational classification, marital status, and menopausal status only for women), lifestyle factors (*i.e.*, smoking status, alcohol consumption, eating habits, intake of multi vitamin, and physical activity), psychological condition (*i.e.*, PWI status, stress events, and self-reported health status), and anthropometry (*i.e.*, body mass index and waist circumference)
- Subjects who were currently taking any medications for diabetes mellitus, depression, hypertension, stroke, peptic ulcer, and arthritis were excluded from the primary analysis
- According to sex strata, women who were currently taking any medications for diabetes mellitus, hyperlipidemia, depression, cataract, hypertension, myocardial infarction, stroke, asthma/chronic bronchitis, fatty liver disease, gastritis, peptic ulcer, arthritis, osteoporosis, and bladder infection were excluded from the primary analysis
- Subjects who were currently taking any medications for selected diseases were wholly excluded from the primary analysis
- Defined as positive wellbeing group with PWI score  $\leq 8$ , moderate distress group with  $8 < \text{PWI score} < 27$ , and severe distress group with PWI score  $\geq 27$
- Defined as follows: Quartile 1:  $\leq 21.8$ , Quartile 2:  $21.8 < \text{BMI} \leq 23.5$ , Quartile 3:  $23.5 < \text{BMI} \leq 25.5$ , and Quartile 4:  $25.5 < \text{BMI}$  in women
- Defined as follows: Quartile 1:  $\leq 73.5$ , Quartile 2:  $73.5 < \text{WC} \leq 79.0$ , Quartile 3:  $79.0 < \text{WC} \leq 84.3$ , Quartile 4:  $84.3 < \text{WC}$  in women
